# Supplementary material
Source: publisher figshare collection journal article supplement (https://gsajournals.figshare.com/articles/dataset/_/12901601)
Supplement: Supplementary file 1 [file 1]

## Sheet: large subunit
general name	C. elegans name	Sequence ID	Wormbase ID
uL1	rpl-1	Y71F9AL.13	WBGene00004412
uL2	rpl-2	B0250.1	WBGene00004413
uL3	rpl-3	F13B10.2	WBGene00004414
uL4	rpl-4	B0041.4	WBGene00004415
uL5	rpl-11.1	T22F3.4	WBGene00004422
	rpl-11.2	F07D10.1	WBGene00004423
uL6	rpl-9	R13A5.8	WBGene00004420
eL6	rpl-6	R151.3	WBGene00004417
eL8	rpl-7A	Y24D9A.4	WBGene00004419
uL11	rpl-12	JC8.3	WBGene00004424
uL13	rpl-16	M01F1.2	WBGene00004428
eL13	rpl-13	C32E8.2	WBGene00004425
uL14	rpl-23	B0336.10	WBGene00004435
eL14	rpl-14	C04F12.4	WBGene00004426
uL15	Y37E3.8	Y37E3.8	WBGene00021350
eL15	rpl-15	K11H12.2	WBGene00004427
uL16	rpl-10	F10B5.1	WBGene00004421
uL18	rpl-5	F54C9.5	WBGene00004416
eL18	rpl-18	Y45F10D.12	WBGene00004430
eL19	rpl-19	C09D4.5	WBGene00004431
eL20	rpl-20	E04A4.8	WBGene00004432
eL21	rpl-21	C14B9.7	WBGene00004433
uL22	rpl-17	Y48G8AL.8	WBGene00004429
eL22	rpl-22	C27A2.2	WBGene00004434
uL23	rpl-25.1	F55D10.2	WBGene00004438
	rpl-25.2	F52B5.6	WBGene00004439
uL24	rpl-26	F28C6.7	WBGene00004440
eL24	rpl-24.1	D1007.12	WBGene00004436
	rpl-24.2	C03D6.8	WBGene00004437
eL27	rpl-27	C53H9.1	WBGene00004441
eL28	rpl-28	R11D1.8	WBGene00004442
uL29	rpl-35	ZK652.4	WBGene00004449
eL29	rpl-29	B0513.3	WBGene00004443
uL30	rpl-7	F53G12.10	WBGene00004418
eL30	rpl-30	Y106G6H.3	WBGene00004444
eL31	rpl-31	W09C5.6	WBGene00004445
eL32	rpl-32	T24B8.1	WBGene00004446
eL33	rpl-33	F10E7.7	WBGene00004447
eL34	rpl-34	C42C1.14	WBGene00004448
eL36	rpl-36	F37C12.4	WBGene00004450
eL37	rpl-37	C54C6.1	WBGene00004451
eL38	rpl-38	C06B8.8	WBGene00004452
eL39	rpl-39	C26F1.9	WBGene00004453
eL40	ubq-2	ZK1010.1	WBGene00006728
eL41	-	-	-
eL43	rpl-43	Y48B6A.2	WBGene00004456
eL44	rpl-36.A	C09H10.2	WBGene00004454
general name	C. elegans name	Sequence ID	Wormbase ID
eS1	rps-1	F56F3.5	WBGene00004470
uS2	rps-0	B0393.1	WBGene00004469
uS3	rps-3	C23G10.3	WBGene00004472
uS4	rps-9	F40F8.10	WBGene00004478
eS4	rps-4	Y43B11AR.4	WBGene00004473
uS5	rps-2	C49H3.11	WBGene00004471
eS6	rps-6	Y71A12B.1	WBGene00004475
uS7	rps-5	T05E11.1	WBGene00004474
S7e	rps-7	ZC434.2	WBGene00004476
uS8	rps-22	F53A3.3	WBGene00004491
S8e	rps-8	F42C5.8	WBGene00004477
uS9	rps-16	T01C3.6	WBGene00004485
uS10	rps-20	Y105E8A.16	WBGene00004489
eS10	rps-10	D1007.6	WBGene00004479
uS11	rps-14	F37C12.9	WBGene00004483
uS12	rps-23	F28D1.7	WBGene00004492
eS12	rps-12	F54E7.2	WBGene00004481
uS13	rps-18	Y57G11C.16	WBGene00004487
uS14	rps-29	B0412.4	WBGene00004498
uS15	rps-13	C16A3.9	WBGene00004482
uS17	rps-11	F40F11.1	WBGene00004480
eS17	rps-17	T08B2.10	WBGene00004486
uS19	rps-15	F36A2.6	WBGene00004484
eS19	rps-19	T05F1.3	WBGene00004488
eS21	rps-21	F37C12.11	WBGene00004490
eS24	rps-24	T07A9.11	WBGene00004493
eS25	rps-25	K02B2.5	WBGene00004494
eS26	rps-26	F39B2.6	WBGene00004495
eS27	rps-27	F56E10.4	WBGene00004496
eS28	rps-28	Y41D4B.5	WBGene00004497
eS30	rps-30	C26F1.4	WBGene00004499
eS31	ubl-1	H06I04.4	WBGene00006725

## Sheet: small subunit
general name	C. elegans name	Sequence ID	Wormbase ID
eS1	rps-1	F56F3.5	WBGene00004470
uS2	rps-0	B0393.1	WBGene00004469
uS3	rps-3	C23G10.3	WBGene00004472
uS4	rps-9	F40F8.10	WBGene00004478
eS4	rps-4	Y43B11AR.4	WBGene00004473
uS5	rps-2	C49H3.11	WBGene00004471
eS6	rps-6	Y71A12B.1	WBGene00004475
uS7	rps-5	T05E11.1	WBGene00004474
S7e	rps-7	ZC434.2	WBGene00004476
uS8	rps-22	F53A3.3	WBGene00004491
S8e	rps-8	F42C5.8	WBGene00004477
uS9	rps-16	T01C3.6	WBGene00004485
uS10	rps-20	Y105E8A.16	WBGene00004489
eS10	rps-10	D1007.6	WBGene00004479
uS11	rps-14	F37C12.9	WBGene00004483
uS12	rps-23	F28D1.7	WBGene00004492
eS12	rps-12	F54E7.2	WBGene00004481
uS13	rps-18	Y57G11C.16	WBGene00004487
uS14	rps-29	B0412.4	WBGene00004498
uS15	rps-13	C16A3.9	WBGene00004482
uS17	rps-11	F40F11.1	WBGene00004480
eS17	rps-17	T08B2.10	WBGene00004486
uS19	rps-15	F36A2.6	WBGene00004484
eS19	rps-19	T05F1.3	WBGene00004488
eS21	rps-21	F37C12.11	WBGene00004490
eS24	rps-24	T07A9.11	WBGene00004493
eS25	rps-25	K02B2.5	WBGene00004494
eS26	rps-26	F39B2.6	WBGene00004495
eS27	rps-27	F56E10.4	WBGene00004496
eS28	rps-28	Y41D4B.5	WBGene00004497
eS30	rps-30	C26F1.4	WBGene00004499
eS31	ubl-1	H06I04.4	WBGene00006725
