# Supplementary material
Source: publisher figshare collection journal article supplement (https://gsajournals.figshare.com/articles/dataset/_/12901601)
Supplement: Supplementary file 1 [file 1]

**Figure S1**

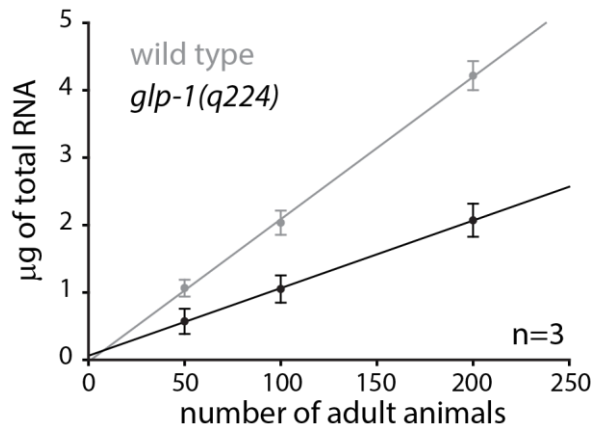

**Figure S1: Half of the total RNA in an adult animal originates in germ cells.**

Total RNA was isolated and quantified from 50, 100 and 200 hand-picked adult animals (age 24h past mid-L4) from the indicated genetic backgrounds. Adult *glp-1(q224)* animals contain only a handful of germ cells and are therefore commonly considered germ cell-less.
